# Supplementary material
Source: publisher figshare collection journal article supplement (https://sage.figshare.com/ndownloader/files/13678409)
Supplement: Supplementary file 1 [file 13678409]

## Sheet: Sheet1
	JAN	FEB	MAR	APR	MAY	JUN	JUL	AUG	SEP	OCT	NOV	DEC
1901	62.4	31.4	39.2	15.6	44	32.1	261.5	107.9	40	2.2	0	3.9
1902	0.1	3.7	27.7	23.8	26.9	55.1	134.9	120.5	82.5	9.7	3	0
1903	34.5	5.2	38.7	9	26.2	14.3	261.6	206.3	110.3	5.3	0.5	21.3
1904	58.6	2.3	132.3	14.1	16.1	36.3	118	161.1	38	11.3	7	13.8
1905	68.4	40.8	32	5.1	10.3	23.9	105.4	52.1	244.6	9.1	0.2	32.9
1906	11.8	99.6	53.5	11.3	17.6	43.5	74.8	163.5	219.4	1.2	0	17.6
1907	35	84.4	48.5	73	6	75.2	92.8	242.7	3.7	5.8	0.3	0.1
1908	63.7	17.3	4.7	57.7	13.9	47.8	178	537	85.5	4.7	1.7	21.8
1909	41.5	29.5	10.6	91.1	7.1	102.6	388.7	126.4	185.4	5	0.8	87.5
1910	62.5	15.8	11.9	41.8	6.7	116.7	175.2	204.9	25.5	4.9	0	13.6
1911	98.4	14.1	108.1	20.8	12.8	62.3	54.7	116.3	52.8	13.7	25.6	4
1912	74.1	12.5	17.7	51.4	13.6	28.4	114.1	219.9	19.3	1	7.8	9.9
1913	13.2	55	50.2	12.3	67.3	59.3	161.2	226.4	30.7	4	2.8	26.2
1914	29	57.1	21.5	49.6	30.6	50.3	293.4	123.5	158	52.7	13.9	32
1915	25	78.8	39.8	25.9	2.8	44.6	62.7	75.9	96	35.7	0	7
1916	7.3	29.2	11	12	12.2	35.2	361.9	251.2	59.9	16.3	0.5	0.3
1917	13.2	5.6	19	64	25.2	97.8	132.8	359.6	268.9	43.1	0	10.8
1918	5.8	7.7	73.5	76.6	0.7	65.5	74.2	140.8	27.3	2.2	5.7	18.2
1919	87.1	31.2	26.3	22.1	17.8	9.4	266.4	187.6	29.2	0.5	2	39.4
1920	50.1	29.5	37.2	13.5	21.9	21	78.6	131.3	49.6	1.4	0.8	1.8
1921	23.5	8.3	7.5	8.8	7.7	54.1	214.3	224.9	62.8	20.9	0.6	36.7
1922	29.8	25	14.8	13.3	9.8	55.2	88.5	115.2	258.9	3.4	0	50.8
1923	59.7	63.8	21.5	48.3	38.5	10.2	235.6	295	16.1	16.7	2.6	53.2
1924	63.7	75.1	18.2	14.4	40.8	1.3	267.5	83.2	127.6	0.8	1.9	78.7
1925	26.3	13.9	9.5	9.8	33.3	124.5	233	188.4	36.2	11.7	21.9	0
1926	23.9	13.6	71.4	31.8	28.9	19.6	126.5	332.5	91.9	0.4	1.4	17.1
1927	9.1	33.1	19.3	16.2	17.5	23	169.5	149.2	42	3.5	1.2	63.7
1928	21.9	43.8	21.9	34.1	8.1	28.6	110.5	169.3	179.9	0.3	16.6	37.5
1929	17.9	11.2	6.2	11	5.9	115.6	254	398.3	24.1	11	1	82.4
1930	37.6	18.8	11.6	60.9	15.2	37.7	303.4	68.2	82.7	6.2	0.3	8.2
1931	51.2	35.7	23.1	17	32.3	11.5	323.4	230.7	67.2	31.9	0.8	1.4
1932	53.7	12.5	30.7	11.7	15.3	48	267.2	98.7	26	3.4	1	54.2
1933	13.5	20.6	38.7	29	9.5	62.1	176.2	326.1	114.3	6.2	10.3	0.6
1934	33.4	10.1	46.6	9.5	10	37.1	133.6	154.8	20.6	0.7	0.4	20.1
1935	102.2	82.6	23.5	48.4	10.5	18.5	103.8	183.5	56.8	5.2	19.2	7.6
1936	9.9	70.1	43.9	29.8	5.2	158.9	144.9	121.4	56.8	24.2	5.2	32.9
1937	11.5	126.5	21.4	65.4	10.4	23.7	292.9	26.9	56.3	12.9	0.8	36.7
1938	72.5	41.7	16.4	19.8	3.3	142.5	64.4	98.8	5.8	17.5	0.5	4.8
1939	20.7	86.5	62	12.5	6.9	61.6	122.5	69.8	50.6	9.1	0	0.2
1940	70.6	36.1	27.6	16	7.8	113	86.1	157.1	54.8	1.2	0.9	2.4
1941	46.5	15.4	23.1	9.7	24.1	55.1	167.7	93.3	132.8	4.6	2.6	22.7
1942	37.5	67.9	30.5	48.1	28.8	45.7	205.3	243.9	81.8	6.7	2.1	47.4
1943	56	4.3	16.7	25.8	21.7	68.8	148.6	119.7	39.6	0.2	0.5	3.8
1944	54.2	65	44	75.5	4.6	51.2	152.2	251.7	71.3	1.5	3.3	25.7
1945	104.2	5.6	31.2	74.9	15.6	67.5	152.9	144.5	98.6	9.4	1.4	3.8
1946	8.7	25.2	21.8	12.2	21.3	69.8	142.1	168.9	10.9	36.7	6.1	25.8
1947	20.7	25.6	17	1.6	9.7	21	70.1	223.4	120.2	18.8	1	34.4
1948	17.8	65.9	108.3	25.6	14.6	47.1	407.3	284.5	76	1.7	3.7	36.8
1949	23.5	54.6	28.7	5.8	8.8	30.9	248.4	82.6	108.7	1	1	2.6
1950	115.8	33.9	81.2	16.4	10.8	10.5	195.7	218.4	241.4	0.4	0	0.5
1951	42.5	12.8	59.7	37	41.7	36.2	136.9	189.9	8.4	8.3	27.5	4.4
1952	33.5	19.2	47.9	5.7	8.2	76.1	163.9	140.3	11	1.5	1.2	4.3
1953	68.6	10.2	6.8	17.6	7.2	54.6	201.8	238.3	94.3	1.8	2.3	19.5
1954	62.8	81.6	12.2	3.1	11.8	25.3	121.8	60.9	285.8	26.5	1.1	0.3
1955	21.7	2.9	49.5	22.5	23.9	18.5	112.9	269	164.2	32.3	1	15.2
1956	38.1	12.8	59.7	22.2	2	90.7	320.9	257.6	33.5	24.1	0.6	3.2
1957	126.9	8.3	58.4	51.5	22.9	27.5	118	310.5	21.5	26.2	22.3	32.6
1958	12.9	3.3	18.5	8.7	5.5	42.8	211.9	98.2	203.1	16.5	2.3	70.5
1959	81	46.7	22.3	8.6	27	18	363.9	276.1	109.2	23.5	35.5	8.1
1960	28.7	0.8	53.5	23	6.9	28.2	271.7	167.1	38.5	1	0.2	25.3
1961	109.5	35.9	19.9	52.2	16.1	32.2	270.1	175.1	137.7	32.2	8.2	11.1
1962	39	54.4	34.3	11.3	13.3	33.7	164.4	185	237.6	2.7	23	25
1963	0.4	19.4	47.7	34.7	37.2	23	111	129.4	99.9	1.6	20.5	27.2
1964	54.7	9.5	15.5	31.8	28.4	42.5	349	269.3	71.9	0.2	1.7	22.1
1965	28.6	39.5	26.1	72.1	50.4	9.6	206.7	105.3	10.1	26.6	13.2	2.3
1966	0.1	85.5	30.1	24	37.5	87.3	168.2	167.9	134.6	22.8	0.2	7.3
1967	0.5	31.8	94	18.5	10.6	14.2	136.5	254.3	56.2	21.8	5.4	100.8
1968	46.9	42.1	40.1	9.8	11.5	34.5	193.5	219	1	22.4	6.5	17
1969	14.4	34	47.1	51.8	43.1	14.2	223.4	125.5	60.8	8.8	0.7	0
1970	31.2	37.1	23.8	5.2	12.4	110.4	118.3	212.7	111.1	6.8	0	0.6
1971	4.7	36.8	6.1	27.9	36	102.7	160.6	214.4	33.5	2.9	5.8	0.8
1972	27.9	28	24.3	15.5	4.9	52.7	118.6	151.5	78.8	15	17.6	30.5
1973	35.1	26.2	32	6.3	38.4	53.4	328.2	324.5	68.2	3.6	0	52.3
1974	19	18.7	9	7.2	13.2	74.8	191	129.7	22.5	2.4	0	21.3
1975	26.9	46.5	45.8	12	21.3	117.4	272.2	279.9	172.8	0.9	0.2	0.6
1976	43.3	59.5	42.3	24.2	17.5	77.4	207.1	471.3	132.8	18	0	1
1977	61.8	2.4	3	61.9	42.7	115.7	260.9	159.2	45.4	19.3	2.2	17
1978	18.8	33.5	131	19.9	3	67.9	373.8	265.8	99.1	1.8	11.2	1.2
1979	34.8	72.8	75.4	13.3	29.8	63.3	194.2	128.9	85.9	9.4	16.5	7.2
1980	35	25.5	49	17.1	11.1	114	362	219.7	89.2	15	18.3	28
1981	118.8	42.9	88.5	3.6	20	13.7	381.1	141.7	12.1	9.8	25.1	0.1
1982	45.8	40.6	164.4	84.8	51	31.3	104.2	268.5	11.7	14.1	24.5	31.4
1983	58	47.1	75.4	88.5	94.3	36.2	183.4	293	61.5	32	0.6	1.4
1984	3	69.6	32.5	31.4	5.3	52.2	315.6	293	104.1	4.4	8	24.8
1985	9.9	5.8	9.6	52.3	20.5	40.1	261.1	175.5	49	32.2	2.1	61.4
1986	6.5	63.1	54.1	40.5	30.3	59.9	217	227.6	70.6	21.2	16.8	30.7
1987	27.7	57.6	47	22.9	77.5	49.9	104.5	104.2	15.8	39.4	0	2.7
1988	19.9	25.1	79.3	9.2	2.9	64.2	353.5	193.8	177.6	6.4	3.3	63.4
1989	46.1	12	41.7	14.3	12.5	30	299.3	174.6	66.9	2.3	12.5	34.2
1990	20.1	102.1	112.2	30.5	18.6	27.8	236.8	300.1	202.8	4.6	5.9	89.7
1991	4	70.7	32.3	87.4	30.5	59.3	133.5	214.4	90.1	5.9	2.4	13.7
1992	85.8	53.1	93.4	23.2	42.6	31.7	118.2	257.1	165.1	10.1	25.8	8.1
1993	24.1	33.2	56.2	35.5	16.4	59.8	278.5	43	74.6	0.7	2.6	0
1994	29.7	28.3	16.7	30.2	44.8	45.1	264.2	226.6	87	14.2	1.4	48.4
1995	42.2	90.7	42.1	38.1	6.4	46.7	367.4	341.8	71.3	10.7	11.7	4.6
1996	40.4	68	45.1	11.2	16.6	184.8	134.8	323.7	64.2	14.4	2.1	1.2
1997	21.3	12.2	32.7	78.1	36	87.8	289.6	436.3	58.7	46.6	27.1	16.4
1998	9.5	68	27.5	55.2	18.1	36.7	225.5	157	72.8	49.2	0	0.6
1999	87.9	12.7	28.6	3.1	13.7	56	149.6	200.2	72.4	2.7	6.6	0
2000	50.1	28.1	7.2	4.9	24.6	87.3	267.7	149.7	59.1	1	E-01 4.500000	1.6
2001	8	5.2	28.5	17.9	43	133	309.4	98.9	69	6.3	1.5	10.1
2002	15.9	15.4	21.6	13.5	25.9	80.6	71	165.9	119.4	7.4	1.6	14
2003	17.8	134.7	50.1	15.8	15.1	79.8	259.4	189.2	82	7.4	24.7	17.9
2004	73.7	23.8	1.1	29.8	55.4	71	144.7	230.3	28.6	24.2	10.3	18.6
2005	91.1	73.2	57.7	18.8	15.2	36.2	245.4	138.4	88.4	12.9	2.9	0.2
2006	43.1	16.2	42.4	7.3	24.2	88.3	359.4	270.6	157.5	41.6	20.4	53.2
2007	1.4	113.7	98.8	1.4	24	127.8	165.2	124.6	91.1	0	13.2	4.7
2008	48	19.2	2.3	77.6	34.5	147.1	171	333.9	63.1	19.2	2.4	27.8
2009	48.5	44	39.2	33.9	14	37.5	117.1	146.4	37	5.1	12.6	1.7
2010	7	16	20.4	7.9	26.8	25.8	282.8	237.2	85.1	4.4	1	17.5
2011	5.6	59	16.2	31.6	10.7	105.4	210.6	262	178.7	7.6	4.3	11.5
2012	51.5	13.7	9.7	58.3	8.2	12.3	115.8	207.3	194.4	21.4	2.2	33.3
2013	18.7	72.3	37.3	43.6	7.6	143	244.6	250.7	57.1	11.9	23	6.2
2014	16.8	25.5	86.1	74.8	37.5	48.5	117	123.3	292.6	22.1	18.9	0
2015	36.1	38.2	144.1	51.2	28.5	76.6	277.8	197.3	140.4	19.4	5.7	9
2016	31.7	14.6	64.5	9.4	37	125.4	256.9	246.9	51.6	0.2	1.4	3.9
	38.74	37.9	40.8	29.73	21.4	58.04	202.29	198.44	88.63	12.3	6.53	20.48	GWp
	38.74	37.9	40.8	29.73	21.4	58.04	202.29	198.44	88.63	12.3	6.53	20.48	GW/Preciptn
	42.13	39.07	41.56	27.09	23.23	79.02	236.8	229.44	141.72	13.08	7.42	19.19	NW/Preciptn
	12.19	14.673	19.854	26.004	31.136	33.352	31.138	30.098	28.958	25.074	18.722	13.532	GW/Temp
	10.01	12.4	17.92	23.75	28.41	30.72	29.54	28.64	26.9	22.68	16.26	11.36	NW/Temp
		GW/Preciptn	NW/Preciptn	GW/Temp	NW/Temp
		38.74	42.13	12.19	10.01
		37.9	39.07	14.673	12.4
		40.8	41.56	19.854	17.92
		29.73	27.09	26.004	23.75
		21.4	23.23	31.136	28.41
		58.04	79.02	33.352	30.72
		202.29	236.8	31.138	29.54
		198.44	229.44	30.098	28.64
		88.63	141.72	28.958	26.9
		12.3	13.08	25.074	22.68
		6.53	7.42	18.722	16.26
		20.48	19.19	13.532	11.36

## Sheet: Sheet2
	JAN	FEB	MAR	APR	MAY	JUN	JUL	AUG	SEP	OCT	NOV	DEC
1901	11.7	13.6	20.7	25.3	30.7	33.5	31.2	30.9	29.1	26.3	19.4	13.9
1902	13.6	16.1	21.3	26.3	32	33.1	31.4	30.6	28.9	25	18.7	12.7
1903	12.1	14.5	18	24.2	30.2	34.2	31.4	30	30	25.6	18.3	12.9
1904	11.1	15	19.3	26.7	31.2	34.2	31.6	30.4	28.8	24.8	18.4	13.9
1905	10.8	9.9	16.4	24	32.4	34.1	31.9	31.1	29.2	25.4	19.6	13.3
1906	10.4	12.7	17.9	25.2	32.7	33.2	32.2	30.9	28.6	25.8	19.9	15
1907	14.6	13.3	17.2	24.6	29.7	32.1	31.5	29.8	29.7	25.4	19.6	12.8
1908	13.4	15.1	19.9	26.6	31	34.1	31.3	29.1	27.8	24.2	18.4	13
1909	10.7	12.6	19.6	25.4	30.8	33.2	30.3	30.1	27.4	24.7	20	13
1910	11.9	14.4	19.1	24.6	31.7	33.2	30.7	30	29.5	24.7	18	12.3
1911	12.7	14.2	17.5	25.4	31.9	33.8	32.2	31.1	29.7	25.6	16.5	12.8
1912	13.1	16	19	25.7	31.1	33.9	32	29.8	27.8	25	17.9	13.1
1913	13.1	14.3	17.2	26.3	30.4	32.4	30.5	30.1	28.3	24.8	17.8	12.9
1914	14.2	13.6	18.6	25.4	31.4	34	31.1	30	29.4	23.1	18.7	12.4
1915	11.3	12.5	20.6	26.1	34	33.7	31.9	31	30.7	26.2	19	12.8
1916	13.5	14.3	22.2	27.2	30.3	34	30.7	29.9	28.9	25.3	16.9	12.7
1917	12.9	16.2	19.6	23.4	28.8	33	31	29.5	28.1	23.6	16.8	13.2
1918	10.9	14.8	18.9	23.5	33.5	33.6	32.2	31.2	28.3	24.7	18.1	12.2
1919	12.1	12.2	19.6	25.3	30.7	35	31.8	30	28.1	24.5	17.7	12.3
1920	11.7	12.6	18.7	24.5	27.7	32.1	32.3	30.2	29.6	25.6	19.3	13.2
1921	12.5	12.6	22.2	28.5	33	33.4	31.9	30	28.9	23.8	18.6	14.6
1922	12.2	15.8	20.9	26.4	30.9	33.3	32.3	31.2	28.8	23.8	18.1	13.5
1923	12.1	14.1	20.2	26.9	30.2	34.4	30.5	29.6	28.4	23.6	17.6	13.1
1924	11.4	14.2	20.6	26.2	27.5	34	32.4	30.4	27.7	24.8	17.9	13.8
1925	11.1	12.8	20.8	28.2	30.9	32.6	30.8	29.9	29	25	17.1	12.8
1926	12.9	16.3	18.6	23.3	29	33.7	32.1	30.4	28.6	24.5	16.4	12.9
1927	11.3	13	18.8	25.2	30	32.8	31.6	30.2	28.8	25.5	18.6	14.2
1928	12	15.2	19.8	26.2	32.8	33.9	32	30.7	28.6	26	18.8	12.5
1929	11.7	12.6	22	27.3	31.9	33.7	30.9	30	29.7	24.5	18.6	11.5
1930	10.6	13	20.5	24.9	31.2	32.9	30.5	30.5	28.8	25.1	18.3	13.4
1931	13.5	12.4	19.9	27.6	31	33.1	30.3	31.4	29.3	25.8	18.6	14.1
1932	13.8	14.6	20.8	27.3	29.9	34.4	31.9	29.9	30	25.1	18.7	13
1933	10.4	15.5	19.7	24.1	30.5	34.2	31.9	28.8	27.9	25	19	14.9
1934	10.6	17.7	19.6	26.4	29.9	33.8	31.8	30.2	30.1	24.5	18.4	14.4
1935	10.7	15	20.4	22.7	31	33.1	31.3	29.6	29.1	24.3	18.8	13.2
1936	11.1	15.7	18.6	25.3	34.2	32.9	31.1	30.5	29.4	25.5	18.1	13.1
1937	11.7	15	19.5	25	31.6	34.5	30.7	31.5	29.3	23.7	18	12
1938	10.9	12.5	19.6	26.9	34.1	32.6	32.3	31.2	29.4	25.2	17.3	13.4
1939	12.7	14.2	17	23.9	31.9	33.3	31.7	31.1	30.3	25.8	18.7	14.3
1940	13	15.2	18.9	25	31.9	33.6	32.3	29.8	28.5	25.4	19.7	13.5
1941	12.1	16.1	22.1	28.4	33	33.7	31.7	31.4	28.6	27.9	19.5	14.6
1942	11.3	14.6	21.7	27.8	31.5	33.7	30.8	29.8	28.5	25	20.3	13.1
1943	11.7	15.2	20.8	25.3	30.4	33.2	31.1	30.8	30.2	25.2	19.6	14.9
1944	11.7	13.2	19.8	25.9	32.4	33.6	32	30	28.1	24.7	18.9	13.7
1945	10.6	13.8	20.1	24.6	30.6	33.5	31.5	30.3	29.6	25.2	19	12.7
1946	13.4	17	19.6	29.8	33.1	34.2	32.3	31	29.8	26.6	18.1	11.9
1947	10.9	14.5	21.6	28.1	32.8	35.1	31.9	31	29.6	24.6	20.1	13.5
1948	12.5	14	19	27.1	32.3	32.8	31.3	29.8	29.7	26	17.5	13.2
1949	13.5	13.5	19.9	27.9	33.6	32.4	31.1	30.4	30.8	24.6	17.1	12.8
1950	12.6	12.4	18.3	24	31.5	34.4	31.2	30	27.2	24.3	17.8	11.6
1951	12	13.9	20.4	23.6	30.2	32.5	31.1	30.2	29.9	27.4	20.1	14.7
1952	12.8	16.2	19.5	27.4	31.6	33.6	30.7	29.9	29.6	25.4	18.6	13.4
1953	11.8	16.7	22.7	27	32.2	34.1	31.8	30	28.8	25.3	18.7	16
1954	11.2	14.9	20.2	26.6	32.3	34	31.3	31.3	29.5	23.3	18.4	13.4
1955	12.2	16.2	21.8	24.5	28.4	34.2	31.7	29.9	29	24.5	18.9	14.1
1956	12.3	15.5	19.7	26.6	34.3	33.2	29.8	29.1	29.9	24.3	18.1	13.9
1957	11.6	13.6	19.1	23.6	28.2	32.3	31.9	29.6	28.7	24.4	18.3	13.6
1958	14.2	15.4	20.9	28.4	30.6	33.6	31.9	30.3	28.7	25.2	19	14.3
1959	11.7	13.2	20.7	26.3	30.3	34.3	30.4	30.5	29.5	26.8	18.3	13.7
1960	12	17.7	18.6	24.4	31.3	34.2	31.3	30.9	29.7	25.3	18.2	13.3
1961	13	12.9	20.3	24.9	31.2	33.8	31.1	30.3	30.1	25	17.1	12.2
1962	12	15.8	19.8	26.6	30.7	33.6	31.4	30.4	27.7	24.9	18	12.8
1963	12.6	16.8	19.7	25.2	29	34.2	32.1	30.2	28.8	26.2	19.2	13.4
1964	10	14.3	21.4	26.4	29.7	32.8	30.1	30.5	29.1	24.9	17.6	13
1965	13.4	14.5	19.7	23.1	29.1	33.7	30.4	29.3	28.9	25.9	19.9	12.6
1966	13.1	17	19.8	24.9	30.5	33.3	30.7	30.3	27.8	24.4	18.1	12.6
1967	11.4	16.5	18.8	24.9	29.6	34	31.5	29.7	29.2	23.9	18.4	13.2
1968	10.7	12.5	20	25.9	29	34	31	29.8	30	24	18.4	13.2
1969	12	14.5	22.4	25.6	29.4	33.5	31.6	30.6	29.1	25.9	19.7	14.2
1970	12.7	15.2	19.6	27.9	32.4	33.4	31.7	30.5	29.6	26.2	18.4	13.8
1971	11.8	15.2	21	27.8	31.6	33	30.7	29.9	28.4	24.7	19.4	14.3
1972	12.7	12.8	20.3	25	31	33.8	31.1	29.8	28.2	24.1	19.6	13.7
1973	12.1	16	19.3	27.4	31.8	34.6	30.8	29.6	30.1	24.8	18.7	12.5
1974	12.1	13.1	21.7	27.8	31.1	32.3	30.9	30.7	29.3	24	18	12.1
1975	11.9	13	18.6	25.6	31	32.3	29.6	29.6	28.5	25.8	17.4	13.8
1976	12.9	14.4	18.5	25.3	30.9	31.9	31.3	28.4	28.3	25.4	19	13.5
1977	11.9	15	21.9	26.3	29.4	32.7	30.8	30	28.7	26.1	20.6	14.4
1978	11.6	14.6	18	26.4	33.7	34.5	29.7	30.2	29.1	25.3	18.7	14.3
1979	13	14.6	18.1	27.6	28.9	33.5	31.5	30.2	28	25.5	19.5	14.4
1980	12.4	15.2	18.7	27.8	32.3	33.6	31	29.8	28.4	25.3	19	13.9
1981	12.9	15.6	19.2	26.7	31.8	33.3	30.2	29.9	28.9	24	17.9	13.3
1982	12.9	12.9	17.1	25.1	28.6	32.9	31.8	29.7	28.6	25	18.6	13.5
1983	12.2	14.1	17.6	23	29.2	31.9	30.5	29.9	29.4	24.2	18.7	13.6
1984	11.9	13.1	21.6	26	33	34.8	30	29.9	27.3	24.1	18.2	13.1
1985	12.6	16.3	21.7	26.4	31.3	33.3	30.5	30	29.3	23.9	18.8	14.1
1986	11.1	14.5	18.5	25.1	29.1	32.8	29.9	29.5	28.4	25	19.1	12.7
1987	12.7	15.9	19.9	26.3	27.3	32.2	31.6	30.9	30.4	25	19.3	14.3
1988	14	16.2	19.1	27.6	32.9	33.4	30.7	29.4	28.8	24.7	19.4	14.3
1989	11.9	14	19	24.4	30.5	32.4	30	28.7	28.8	25	18.7	13.9
1990	14.2	15	18.4	25.2	32.5	33.6	30.9	29.6	29.6	24.1	19.7	13.5
1991	11.6	14.2	19.1	24	29.4	32.8	31.7	30	29.1	24	18.6	14.7
1992	13.1	14.5	18.9	24.4	29.1	32.7	30.3	29.6	28	24.8	18.9	15.1
1993	11.7	17.3	18.2	26.1	32.1	33	29.7	31	28.9	24.8	19.7	14.5
1994	13.4	14.5	21.3	24.4	31.2	33.8	30.7	29.8	27.6	23.8	19.6	13.8
1995	11.8	15	18.7	23.9	31.4	34.1	30.7	29.1	28.6	25.3	18.9	13.4
1996	12.2	15.9	20.7	26.6	29.7	31.7	30.4	28.9	29.2	24.1	18.1	13
1997	11.6	15	19.5	24.3	28.2	31.5	31.2	29.2	29.3	22.9	18.1	12.5
1998	12.4	15.3	18.8	26.7	31.5	32.8	31	30.3	28.9	26	18.8	13.2
1999	12	16.1	20.4	28.3	32	32.9	31.5	30.1	30.4	26.2	20	14.5
2000	12.5	14.1	19.6	28.4	34.1	33.1	30.2	29.9	28.8	26.5	19.7	14.7
2001	12.1	16.4	21.1	26.8	33.2	32.3	30.2	30.4	28.5	26.1	19.6	14.9
2002	12.8	14.9	21.3	27.8	33	32.9	31.8	30.4	27.4	25.6	20	14.8
2003	12	15	19.7	27	30.1	33.6	30.4	29.4	28.7	24.8	18	14.1
2004	12.7	16.5	23.8	28.3	31.4	31.8	30.8	29.3	29.2	23.5	19.5	14.5
2005	11.7	13.5	20.2	25.9	29.9	33.7	30	30.3	29.2	25.4	18.8	13.2
2006	12.5	18.7	20.4	27.4	33.6	32	30.9	29.4	28.2	25.9	19.5	13.4
2007	12.5	15.6	19.3	29.1	31.7	32.6	30.4	30.4	29	24.9	19.8	13.3
2008	11	14.2	22.9	25.8	31.3	32.9	30.6	28.8	28.1	26.3	19.6	14.8
2009	13.7	16.5	20.9	26.3	32	32.8	31	30.9	29.1	25.6	18.2	14
2010	13.3	15.7	23.8	29.5	31.7	32	30.2	29.4	28.2	26.4	19.9	13.5
2011	11.5	15.3	21.2	25.7	33.3	33.4	30.5	29.5	28.5	25.8	20.4	14
2012	11.4	13.4	19.9	25.8	31	33.8	32	29.8	28.4	24.5	18.9	13.9
2013	12.1	14.5	19	26.5	32.3	33.4	31.4	29.7	29.7	26.9	18.9	14.3
2014	12.8	14.7	19	25.2	30.3	34.3	31.8	30.7	28.8	25.6	19.1	12.9
2015	12.5	14.3	18.8	26.4	31.3	32.4	30	29.6	28.6	25.8	19.6	14.2
2016	13.3	16.6	20.7	27.4	32.3	34.2	31.2	29.4	30	26.6	19.7	15.3
	12.19	14.673	19.854	26.004	31.136	33.352	31.138	30.098	28.958	25.074	18.722	13.532	GWt

## Sheet: Sheet3
	JAN	FEB	MAR	APR	MAY	JUN	JUL	AUG	SEP	OCT	NOV	DEC
1901	84.7	59.6	43.9	13.8	36.9	39	296.9	170.9	62.1	1.8	0	10.5
1902	0.5	5.9	29.1	32.7	33.9	73.3	196.6	144.9	142.8	9.4	3.2	0
1903	44.1	7.5	47.8	10.3	26.8	18.9	305.7	266.7	178.5	5.9	0.5	26.6
1904	55	4.1	119.6	9.4	22.4	50.1	205.3	223.1	69.9	14.4	13.8	21.1
1905	75.9	49.7	42.6	6.2	8.7	30.1	159	113.2	269.3	6.4	0.3	30.3
1906	19.9	100.9	83	10.3	20.1	81	90.2	189.9	286.4	0.6	0	21.1
1907	46.9	81.1	77.1	77.4	8	89.3	113.4	332.4	12	4.8	0.2	0.1
1908	65.3	31.7	7.6	57.6	19.8	48.2	215.2	516.6	131.6	4	4.7	18.6
1909	61.6	32.9	11.2	79.2	8.9	124	468.7	170.3	234.9	7.9	1.3	65
1910	57.3	22.8	14.1	28.4	6.3	144.7	258.7	263.1	104.5	14	0	20.5
1911	101.9	15.2	109.8	18.5	8.5	81.8	76.1	155.7	130	20.2	34.9	3.8
1912	76.3	17.9	21.6	38.3	19.8	26.7	196	245.5	85.2	0.7	11.1	9.7
1913	17.2	74.1	65.8	12.9	65.3	92.3	162.9	225	42.5	3.4	4.8	32.4
1914	20.3	53.9	26.5	51.2	31.6	72.7	306.5	179.3	273.3	53.9	13.3	25.6
1915	54.8	75.1	48.6	22.1	5.2	53.8	96.8	168.7	161.2	26.3	0	9.8
1916	7.7	38.5	10.7	10.9	11.5	69.4	345.5	252.5	127.7	21.3	0.3	0.6
1917	17.7	12.7	24.7	78.7	33.7	132.6	227.3	371.7	406.5	48.8	0	11.7
1918	9.6	6.6	79.7	76.3	2.5	82.6	145.9	186.8	37.2	3	7.1	15
1919	101.1	29	32.4	22.7	20.4	28.2	353.4	194.4	50.9	0.8	4.2	33.4
1920	47.7	33.4	42.1	13.4	29.6	45.1	195.8	122.5	108.7	1.8	0.8	2.5
1921	40.6	11.3	7.3	9.7	8.7	67.6	210.8	284.1	119	21.1	0.4	33.6
1922	48.1	26.1	16	12.1	9.6	66.6	160.8	209.6	320.7	3.5	0	44.9
1923	60.7	83.5	19.8	27.5	35.3	29	363.6	336.2	41.3	17.1	7.1	50.9
1924	67	68.7	18	12.1	32.4	5.5	298.1	137	248.2	4	2.4	54.4
1925	30	12.6	8.4	11.8	36.9	142.6	302.1	235.4	51.3	12.4	23.3	0
1926	28.5	16.2	82.2	28.2	38.5	29.2	226.9	351	141.9	1.2	4.8	12.2
1927	9.7	52.9	28.1	16.4	18.8	30.8	226.2	183.7	84.7	11.8	3.4	46
1928	41.8	58.9	22.2	31.4	7	33.9	148	201.7	252.5	1.6	19.7	40.4
1929	28.2	10.4	6.3	13.3	7.1	101	295	356.6	44.4	15.9	0.1	60.7
1930	50	27.7	12.4	44.5	15.2	71.7	319.9	120.2	140	7.1	1	18.5
1931	35.3	40.5	24.7	15.1	32.2	16.3	317.5	248.6	124.6	24.6	0.8	0.7
1932	42.6	14.5	27	10.8	16.2	70.8	274.1	132.1	93.7	6.5	0.4	46.5
1933	18.5	31.4	43.3	23.6	19.6	95.3	217.1	359.5	220.1	12.6	7.7	1.2
1934	49.8	9.2	59.6	8.4	11.1	60.2	225.7	201.1	27.5	0.4	0.3	29.6
1935	97.6	63.4	24.1	43.1	9.5	26.6	162.6	248.6	103.6	7.2	22.3	17
1936	8.9	66	38.5	26.2	12.1	180.3	223.6	144.6	103.1	18.8	4.2	35.4
1937	17.3	122.9	21.3	54.5	15.9	55.4	319.1	84.1	122.1	13.7	1.1	37.8
1938	95.8	46.2	15.9	18.8	4.4	142.2	121.4	153.9	16	14.9	2	3.5
1939	22.1	75.7	65.3	15.1	4.8	82.1	185.5	93.6	84	7.6	0	0.1
1940	54.5	44.5	29.3	20.2	10.1	131.9	178.6	221.9	95	1.7	0.9	6.3
1941	53.9	20	24.6	8.5	26.4	80.3	207.1	161.3	176.1	10.7	2.9	21.2
1942	44.9	82.4	23.6	35.2	25	61	261.5	327.5	165.7	6.2	1.7	48
1943	70.6	4.6	20	27.8	20.6	64	185.1	200.5	98.3	0	0.3	4
1944	71.1	60.1	60.2	76.5	6.3	64.9	160.8	263.7	120.5	3.5	4.1	23.8
1945	103	5.3	30	42.7	14.3	74.3	221.5	180.9	175.8	19.7	1	4
1946	8.9	26.2	18.1	15.3	23.3	89.8	214.5	172.4	25.8	43.8	8.6	30.5
1947	25.7	26.5	28.5	2.1	14.4	30.5	113.4	228.3	322.2	19.8	0	44.5
1948	17	70.3	102.6	19.1	10	65.4	390.8	295.7	98.9	2.3	2.7	29.8
1949	25.5	58.9	26.2	10.7	14.1	36.6	326.6	107.6	122.6	1.9	0.2	5.3
1950	107.6	32.8	74	12.2	14.6	25.3	301.4	246.4	389.4	1	0	2
1951	51.1	15.9	81.6	33.4	34.9	44	184.8	234.2	46	5	31.4	4.4
1952	43.6	23.1	61.3	7.3	14.9	104.4	188.5	218.6	16.6	1.1	1.4	9.1
1953	69.9	14.5	12.2	21.5	5.7	78.1	303	256.8	140.2	5.1	2.7	15.2
1954	60.6	94	21.1	3.4	14.7	43.4	193.9	140.3	418.2	27.8	0.9	1.7
1955	45.1	5.3	53.5	21.2	26.8	40.3	179	306.1	233.3	46.1	0	9
1956	41.6	15.3	59	22.8	6.4	126.2	258.7	338.1	56.6	27.4	1.9	10.7
1957	112.6	10.1	54.1	40.4	26.2	47.8	182.8	344	59.9	30.5	22.7	38.5
1958	22.4	6.8	19.2	10.8	8.8	51.3	233.5	165.1	342.5	28.1	2.4	56
1959	79.1	35.8	29.1	6.8	38.2	30.4	386.8	265.2	164.2	20.6	27.4	4.4
1960	41.5	2.7	51	17.2	11	57	279.5	220.2	55.4	0.8	0.7	25.5
1961	102.3	48.2	16.6	37.2	14.1	65.8	251.7	229.3	167.9	26.5	6.3	18.1
1962	58.7	44.7	34.3	13.2	10.3	45.9	235.8	179.3	485.1	0.5	26.6	18.4
1963	2.3	22.2	66.4	24.5	27.7	28.8	146.3	175.5	138.7	1.2	21.3	26.3
1964	42.6	15.3	14.2	30.6	34.1	69.7	389.9	296.2	151.8	0	1.1	20.6
1965	29.1	44.1	28.6	61.2	45.9	9.8	222.3	123.5	22.9	18.5	13.9	2.3
1966	1	E-01 73.50000	38.6	18	43.8	118.7	179.7	236.4	264.4	28.6	0.6	8.7
1967	1.7	34.4	97.8	12.2	18.1	28.5	185.1	281.9	113.7	25	4.7	75.3
1968	41.9	40.9	31.9	11.3	7.9	56.7	251.9	240	8	27.9	4.4	19.1
1969	18.1	37.2	46.7	45.6	33	27.9	206.7	139.8	91.2	8.5	0.4	0.1
1970	34.2	24.8	25	4.8	16.9	166.1	148.5	244.5	162.7	11.6	0	0.6
1971	9.2	40.6	6.1	21.9	41	146.9	186	301	47.4	3.8	10.2	1
1972	20.8	34.8	36	20.1	12.2	57.6	175.7	171.2	116.7	16.2	22.9	25.2
1973	51.2	28.1	36.2	10.8	33.1	107	292.8	361.2	72.9	7.7	0	44.3
1974	26	20.2	15.2	5.2	19.5	113.8	177.7	134.6	44.5	4	0.1	19.9
1975	33.5	43.2	53.7	8.1	20.3	114.2	273	356.3	212.9	4.2	0.4	0.9
1976	49.9	62.8	38	19	14.9	92.4	217.2	452.7	193.8	18	0	1.9
1977	61.1	3.6	3.3	63.3	43.1	125.3	242.7	207.6	106.7	25	2.3	25.7
1978	15.6	41	106.6	19.4	5.8	111.5	393	303.1	137.5	1.6	18.8	3.2
1979	37.4	62.9	69.2	26.7	33.6	76.6	179.4	129.9	127.2	6.9	19.4	9.1
1980	26.7	30	40.2	15.4	10.3	121.2	425.4	214.4	121.6	15	20.1	38.9
1981	101.1	38.2	84.9	9.5	18.7	37	393	146.1	29.1	6.9	30.7	0.3
1982	44.5	40.1	137	87.9	50.9	44.3	116.5	255.5	33	16.5	23.4	32.8
1983	56.9	38.6	68.6	57.3	86.2	55.4	182.9	258.2	101.1	33.2	1.3	3.8
1984	4.7	70.5	31.8	29.4	15.1	76.2	356.2	303.2	145.2	2.8	7.8	22.5
1985	13.1	6	11.4	56.7	22.2	54.5	310.9	233.5	91.9	36.8	2.5	54.1
1986	4.8	57.6	60	38.3	31.8	79.4	224.4	246.3	88.1	18.1	17.5	25.8
1987	35.1	43.8	38.6	28.7	86.7	79.6	118.5	100.1	25.3	45.7	0	4.3
1988	22.2	28.7	72	7.7	6.5	110.2	357.3	246.4	410.9	4.7	1.9	52.5
1989	46.4	15.2	36.1	11.7	17.3	44.1	387	225.5	116.6	5.4	15.3	24.9
1990	24.4	83.4	96.8	26.7	18.1	45.3	306.1	329	215.1	3	7.8	74.4
1991	8.6	51.6	31.7	66.3	31.4	71.8	160.7	196.4	111.7	5.2	1.3	12.8
1992	83.7	51.6	72.5	15	43.3	50.2	142.8	273	249.9	9.3	23.3	6.5
1993	25.1	35.6	51.4	24.9	22.1	95.7	314.6	40.6	97	0.6	4.3	0
1994	43.2	30.6	21	24.4	55.8	65.4	208.1	245.5	135.7	10.4	0.3	39.3
1995	46.9	98.8	29.8	27.9	6.4	67.9	421.7	384.8	77.3	7.6	14.8	6.4
1996	43.8	64.6	51.8	21.5	24	276.7	145.3	366.5	71.2	16.2	2.2	3.1
1997	15.1	12.9	35.9	53.5	36.7	98.4	284.6	489.4	92.5	37.2	31.6	13.9
1998	17.1	62.3	24.9	46.7	19.3	47.7	206.5	135.1	107.7	46	0	1.6
1999	83.4	15.8	26	12.9	16	82.2	163.7	277.3	105.7	0.7	7.3	0
2000	54.5	33.9	10.8	8	32.4	121.6	319.4	146.1	80.9	0.3	7	1.7
2001	10.5	9.3	25.9	17.2	53.1	155.2	351	98.2	90.6	5.1	4.2	10.4
2002	12.7	22.3	23.3	18.6	27.5	124.1	90.3	231.9	188.4	6.5	0.7	11.5
2003	17.9	126.3	49.7	20.1	20.1	116.9	276	173.8	119.8	9.6	26.9	20.9
2004	64.1	21.9	2.6	26.2	63.3	107.9	157.1	203.2	18.3	23.2	11.3	17.8
2005	88.4	69.3	52	22.2	13.3	64.1	261.1	132.8	131.6	9.9	5.6	0.6
2006	48.8	18.8	41.5	9.5	23.3	117.7	398.1	333.7	297.4	48.4	22.8	35.2
2007	1.5	97.7	88.7	5.7	29.6	162.6	146.6	156.3	105.9	0	15.6	4.2
2008	47.4	16.9	2.8	64.7	37.1	196.8	171.4	387.6	105.6	21.8	5.4	21.9
2009	48.3	49.4	34.2	28.1	16.6	47.2	109.8	145.6	74.5	3.1	17.9	4.5
2010	11.7	24.9	14.8	9.8	29.3	48	310	299.5	135.8	7.7	2.1	18.4
2011	11.9	55.6	19.6	30.4	12.3	151.3	222.7	268.7	264.9	7.2	7.1	15.7
2012	54.3	15	16.4	54	5.9	20.4	96	203.7	341.9	17.6	2.6	26.1
2013	27.2	79.4	27.4	47.5	8.5	183.7	254.6	253.6	74.4	12	24.7	6.3
2014	29.2	22.6	75.2	66.8	36.6	68.1	143.3	137.6	479.9	16	17.2	0.7
2015	37.2	44.9	137.7	41.8	27.1	124.7	343.9	201.9	204.4	16.8	5.5	5.5
2016	30.1	14.1	53.7	8.1	42.2	151.6	270	239.9	56	0.1	2.3	0.4
	42.13	39.07	41.56	27.09	23.23	79.02	236.8	229.44	141.72	13.08	7.42	19.19	NWp
